# Supplementary material
Source: Research Square preprint supplement (doi:10.21203/rs.3.rs-9536160/v1)
Supplement: Supplementary file 1 [file 2d44d0f04507a9340a2a0395.docx]

**Supplementary Information**

**Dual limitations of soil moisture and phosphorus on soil quality in flue-cured tobacco fields**

**This file includes:**

Supplementary Table S1 to S4

Table S1 Site characteristics.

Table S2 Spearman correlation matrix based on TDS indicators.

Table S3 Results of the principal component analysis (PCA) of the total data set and minimum data set.

Table S4 Indicator weights for TDS and MDS analyses using PCA and NTA methods.

Supplementary Tables

**Table S1 Site characteristics.**

| ID | County | City | Location | MAT  (℃) | MAP  (mm) | Elevation  (m) | Soil type | Crop Rotation-Previous crop |
| --- | --- | --- | --- | --- | --- | --- | --- | --- |
| 1 | Shilin | Kunming | 24.79°N,103.38°E | 14.93 | 937 | 1869 | Cambisols | Maize-Maize |
| 2 | Shilin | Kunming | 24.68°N,103.37°E | 14.97 | 944 | 1842 | Cambisols | Maize/Passionfruit-Passionfruit |
| 3 | Shilin | Kunming | 24.68°N,103.38°E | 14.9 | 949 | 1845 | Cambisols | Maize/Passionfruit-Passionfruit |
| 4 | Shilin | Kunming | 24.69°N,103.31°E | 15.68 | 921 | 1750 | Cambisols | Maize-Maize |
| 5 | Shilin | Kunming | 24.65°N,103.27°E | 16.08 | 913 | 1669 | Cambisols | Maize-Maize |
| 6 | Weishan | Dali | 25.44°N,100.18°E | 16.69 | 861 | 1740 | Cambisols | Broad Bean/Wheat-Broad Bean |
| 7 | Weishan | Dali | 25.35°N,100.25°E | 17.05 | 862 | 1691 | Cambisols | Barley/Maize-Broad Bean |
| 8 | Weishan | Dali | 25.27°N,100.29°E | 17.05 | 862 | 1695 | Cambisols | Broad Bean/Maize-Barley |
| 9 | Weishan | Dali | 25.37°N,100.22°E | 16.96 | 867 | 1705 | Cambisols | Barley/Rice-Barley |
| 10 | Nanjian | Dali | 24.97°N,100.54°E | 16.25 | 879 | 1934 | Cambisols | Barley/Maize-Barley |
| 11 | Nanjian | Dali | 24.96°N,100.54°E | 16.2 | 883 | 1925 | Luvisols | Barley/Maize-Pea |
| 12 | Nanjian | Dali | 24.95°N,100.49°E | 16.07 | 889 | 1983 | Cambisols | Barley-Barley |
| 13 | Nanjian | Dali | 24.83°N,100.2°E | 15.99 | 931 | 2054 | Luvisols | Wheat/Maize-Wheat |
| 14 | Nanjian | Dali | 24.83°N,100.2°E | 15.99 | 931 | 2083 | Luvisols | Wheat/Maize-Pea |
| 15 | Mile | Honghe | 24.44°N,103.38°E | 15.89 | 950 | 1900 | Cambisols | Maize-Fallow |
| 16 | Mile | Honghe | 24.4°N,103.28°E | 14.58 | 980 | 1899 | Cambisols | Maize-Fallow |
| 17 | Mile | Honghe | 24.39°N,103.24°E | 14.15 | 996 | 1899 | Luvisols | Maize-Maize |
| 18 | Mile | Honghe | 24.41°N,103.23°E | 14.57 | 975 | 1974 | Cambisols | Maize-Maize |
| 19 | Luliang | Qujing | 25.01°N,103.36°E | 16.17 | 902 | 1825 | Cambisols | Wheat-Wheat |
| 20 | Luliang | Qujing | 25.16°N,103.6°E | 14.01 | 976 | 1931 | Cambisols | Green Manure-Green Manure |
| 21 | Luliang | Qujing | 25.18°N,103.52°E | 13.77 | 972 | 1965 | Cambisols | Green Manure-Green Manure |
| 22 | Luliang | Qujing | 25.19°N,103.63°E | 13.83 | 987 | 1998 | Luvisols | Wheat-Wheat |
| 23 | Eshan | Yuxi | 24.32°N,102.07°E | 15.9 | 937 | 1853 | Cambisols | Rapeseed-Rapeseed |
| 24 | Eshan | Yuxi | 24.08°N,102.5°E | 15.76 | 965 | 1894 | Cambisols | Radish-Radish |
| 25 | Huaning | Yuxi | 24.22°N,102.85°E | 15.27 | 947 | 1884 | Cambisols | Radish-Radish |
| 26 | Huaning | Yuxi | 24.2°N,102.85°E | 14.78 | 969 | 1921 | Cambisols | Rapeseed-Fallow |
| 27 | Huaning | Yuxi | 24.36°N,102.95°E | 14.73 | 947 | 2001 | Cambisols | Buckwheat-Buckwheat |
| 28 | Huaning | Yuxi | 24.37°N,102.94°E | 13.79 | 986 | 2209 | Luvisols | Buckwheat-Fallow |

**Table S2 Spearman correlation matrix based on TDS indicators.**

| **Indicators** | **AP** | **AK** | **SWC** | **pH** | **AN** | **TN** | **TP** | **TK** | **BD** | **MWD** | **Sand** | **Silt** | **Clay** | **ACP** | **BG** | **LAP** | **NAG** |
| --- | --- | --- | --- | --- | --- | --- | --- | --- | --- | --- | --- | --- | --- | --- | --- | --- | --- |
| AP | 1.00*** | -0.24* | -0.22* | 0.21. | 0.07 | 0.09 | -0.18 | -0.18. | 0.27* | 0.17 | -0.22* | 0.50*** | -0.01 | 0.12 | 0.13 | 0.16 | 0.20. |
| AK | -0.24* | 1.00*** | -0.01 | -0.22* | 0.1 | 0.24* | 0.26* | 0.22* | -0.24* | -0.19. | -0.12 | -0.32** | 0.03 | 0.12 | 0 | -0.12 | -0.06 |
| SWC | -0.22* | -0.01 | 1.00*** | -0.20. | -0.25* | -0.16 | 0.52*** | 0.20. | -0.30** | -0.27* | 0.66*** | -0.57*** | 0.67*** | -0.29** | -0.15 | -0.34** | -0.23* |
| pH | 0.21. | -0.22* | -0.20. | 1.00*** | 0.02 | 0.12 | -0.18 | -0.27* | 0.12 | 0.48*** | -0.06 | 0.34** | -0.17 | 0.05 | 0.36*** | 0.48*** | 0.25* |
| AN | 0.07 | 0.1 | -0.25* | 0.02 | 1.00*** | 0.65*** | -0.12 | -0.05 | -0.41*** | 0.01 | -0.21. | -0.01 | -0.25* | 0.37*** | 0.07 | 0.01 | 0.35** |
| TN | 0.09 | 0.24* | -0.16 | 0.12 | 0.65*** | 1.00*** | 0.09 | 0.23* | -0.45*** | -0.02 | -0.33** | 0.06 | -0.16 | 0.50*** | 0.27* | 0.12 | 0.46*** |
| TP | -0.18 | 0.26* | 0.52*** | -0.18 | -0.12 | 0.09 | 1.00*** | 0.26* | -0.34** | -0.30** | 0.17 | -0.37*** | 0.37*** | 0.01 | 0.05 | -0.03 | -0.14 |
| TK | -0.18. | 0.22* | 0.20. | -0.27* | -0.05 | 0.23* | 0.26* | 1.00*** | 0.02 | 0.01 | -0.17 | -0.17 | 0 | 0.29** | 0.04 | -0.15 | 0.23* |
| BD | 0.27* | -0.24* | -0.30** | 0.12 | -0.41*** | -0.45*** | -0.34** | 0.02 | 1.00*** | 0.34** | -0.07 | 0.41*** | -0.17 | -0.13 | 0.03 | 0.06 | -0.08 |
| MWD | 0.17 | -0.19. | -0.27* | 0.48*** | 0.01 | -0.02 | -0.30** | 0.01 | 0.34** | 1.00*** | -0.19. | 0.52*** | -0.24* | 0.02 | 0.24* | 0.20. | 0.13 |
| Sand | -0.22* | -0.12 | 0.66*** | -0.06 | -0.21. | -0.33** | 0.17 | -0.17 | -0.07 | -0.19. | 1.00*** | -0.51*** | 0.47*** | -0.56*** | -0.21. | -0.33** | -0.41*** |
| Silt | 0.50*** | -0.32** | -0.57*** | 0.34** | -0.01 | 0.06 | -0.37*** | -0.17 | 0.41*** | 0.52*** | -0.51*** | 1.00*** | -0.36*** | 0.32** | 0.41*** | 0.41*** | 0.23* |
| Clay | -0.01 | 0.03 | 0.67*** | -0.17 | -0.25* | -0.16 | 0.37*** | 0 | -0.17 | -0.24* | 0.47*** | -0.36*** | 1.00*** | -0.23* | -0.24* | -0.28* | -0.45*** |
| ACP | 0.12 | 0.12 | -0.29** | 0.05 | 0.37*** | 0.50*** | 0.01 | 0.29** | -0.13 | 0.02 | -0.56*** | 0.32** | -0.23* | 1.00*** | 0.37*** | 0.20. | 0.57*** |
| BG | 0.13 | 0 | -0.15 | 0.36*** | 0.07 | 0.27* | 0.05 | 0.04 | 0.03 | 0.24* | -0.21. | 0.41*** | -0.24* | 0.37*** | 1.00*** | 0.50*** | 0.45*** |
| LAP | 0.16 | -0.12 | -0.34** | 0.48*** | 0.01 | 0.12 | -0.03 | -0.15 | 0.06 | 0.20. | -0.33** | 0.41*** | -0.28* | 0.20. | 0.50*** | 1.00*** | 0.16 |
| NAG | 0.20. | -0.06 | -0.23* | 0.25* | 0.35** | 0.46*** | -0.14 | 0.23* | -0.08 | 0.13 | -0.41*** | 0.23* | -0.45*** | 0.57*** | 0.45*** | 0.16 | 1.00*** |

***Abbreviations:*** pH, soil pH; AN, available nitrogen; AP, available phosphorus; AK, available potassium; TN, total nitrogen; TP, total phosphorus; TK, total potassium; SWC, soil water content; BD, bulk density; MWD, mean weight diameter; Sand, sand content; Silt, silt content; Clay, clay content; ACP, acid phosphatase; BG, β-glucosidase; LAP, leucine aminopeptidase; NAG, N-acetyl-β-glucosaminidase. *, *p* < 0.05, ** *p* < 0.01, *** *p* < 0.001.

**Table S3 Results of the principal component analysis (PCA) of the total data set and minimum data set.**

| **Indicators** | **PC1** | **PC2** | **PC3** | **PC4** | **PC5** |
| --- | --- | --- | --- | --- | --- |
| AP | 0.43 | -0.15 | 0.26 | 0.21 | -0.14 |
| AK | 0.01 | **0.69** | -0.05 | -0.38 | 0.12 |
| SWC | -0.39 | 0.26 | 0.32 | **0.75** | 0.15 |
| pH | 0.55 | -0.42 | -0.04 | 0.20 | 0.46 |
| AN | 0.39 | 0.43 | -0.60 | 0.10 | -0.18 |
| TN | 0.57 | 0.63 | -0.22 | 0.09 | 0.01 |
| TP | -0.33 | 0.45 | 0.34 | 0.11 | 0.54 |
| TK | -0.07 | 0.49 | 0.56 | 0.32 | -0.27 |
| BD | 0.08 | -0.63 | 0.48 | -0.04 | -0.29 |
| MWD | 0.48 | -0.43 | 0.14 | 0.05 | -0.08 |
| Sand | -0.69 | -0.32 | -0.31 | 0.41 | 0.16 |
| Silt | **0.81a** | -0.40 | 0.05 | 0.07 | -0.07 |
| Clay | -0.04 | 0.26 | **0.69** | -0.45 | 0.02 |
| ACP | 0.63 | 0.47 | 0.13 | -0.03 | -0.14 |
| BG | 0.69 | 0.03 | 0.13 | 0.22 | 0.30 |
| LAP | 0.57 | -0.13 | 0.07 | -0.24 | **0.55** |
| NAG | 0.61 | 0.28 | -0.01 | 0.43 | -0.21 |
| Eigenvalue (%) | 4.15 | 3.00 | 1.88 | 1.60 | 1.25 |
| Cumulative  contribution (%) | 24.43 | 42.09 | 53.14 | 62.53 | 69.86 |

***Note:*** The overall KMO value for the 17 indicators was 0.61, and Bartlett’s sphericity test was significant (*p* < 0.001), indicating that the dataset was suitable for PCA. Variables with the highest absolute loadings on each principal component (PC) are indicated in bold and were subsequently included in MDS.

***Abbreviations:*** AN, available nitrogen; AP, available phosphorus; AK, available potassium; TN, total nitrogen; TP, total phosphorus; TK, total potassium; SWC, soil water content; pH, soil pH; BD, bulk density; MWD, mean weight diameter; Sand, sand content; Silt, silt content; Clay, clay content; ACP, acid phosphatase; BG, β-glucosidase; LAP, leucine aminopeptidase; NAG, N-acetyl-β-glucosaminidase.

**Table S4** Indicator weights for TDS and MDS analyses using PCA and NTA methods.

| **Indicator** | **TDS** | | **MDS** | |
| --- | --- | --- | --- | --- |
| **NTA** | **PCA** | **NTA** | **PCA** |
| AP | 0.03 | 0.03 | / | / |
| AK | 0.00 | 0.05 | / | 0.17 |
| SWC | 0.16 | 0.08 | 0.54 | 0.24 |
| pH | 0.01 | 0.06 | / | / |
| AN | 0.02 | 0.06 | / | / |
| TN | 0.06 | 0.07 | / | / |
| TP | 0.05 | 0.06 | / | / |
| TK | 0.00 | 0.06 | / | / |
| BD | 0.02 | 0.06 | / | / |
| MWD | 0.04 | 0.04 | 0.13 | / |
| Sand | 0.16 | 0.07 | / | / |
| Silt | 0.12 | 0.07 | / | 0.21 |
| Clay | 0.12 | 0.06 | / | 0.20 |
| ACP | 0.09 | 0.06 | 0.33 | / |
| BG | 0.02 | 0.05 | / | / |
| LAP | 0.01 | 0.06 | / | 0.19 |
| NAG | 0.08 | 0.06 | / | / |

***Abbreviations:***AN, available nitrogen; AP, available phosphorus; AK, available potassium; TN, total nitrogen; TP, total phosphorus; TK, total potassium; SWC, soil water content; pH, soil pH; BD, bulk density; MWD, mean weight diameter; Sand, sand content; Silt, silt content; Clay, clay content; ACP, acid phosphatase; BG, β-glucosidase; LAP, leucine aminopeptidase; NAG, N-acetyl-β-glucosaminidase.
